# Supplementary material for: GastroPlus- and HSPiP-Oriented Predictive Parameters as the Basis of Valproic Acid-Loaded Mucoadhesive Cationic Nanoemulsion Gel for Improved Nose-to-Brain Delivery to Control Convulsion in Humans
Source: MDPI journal article supplement (doi:10.3390/gels9080603), 2023-07-26
Supplement: s1 [file s1]

Supplementary Materials

# GastroPlus- and HSPiP-Oriented Predictive Parameters as the Basis of Valproic Acid-Loaded Mucoadhesive Cationic Nanoemulsion Gel for Improved Nose-to-Brain Delivery to Control Convulsion in Humans

Afzal Hussain <sup>1,\*</sup>, Mohammad A. Altamimi <sup>1</sup>, Mohhammad Ramzan <sup>2</sup>, Mohd Aamir Mirza <sup>3</sup> and Tahir Khuroo <sup>4</sup>

<sup>1</sup> Department of Pharmaceutics, College of Pharmacy, King Saud University, Riyadh 11451, Saudi Arabia; maltamimi@ksu.edu.sa

<sup>2</sup> School of Pharmaceutical Sciences, Lovely Professional University, Phagwara 144411, India; mohhammad.26652@lpu.co.in

<sup>3</sup> Department of Pharmaceutics, School of Pharmaceutical Education and Research, Jamia Hamdard, New Delhi 110062, India; aamir.mirza@jamiahamdard.ac.in

<sup>4</sup> PGx Global Foundation, Houston, TX 77035, USA; tahir@pgxglobal.org

\* Correspondence: amohammed2@ksu.edu.sa

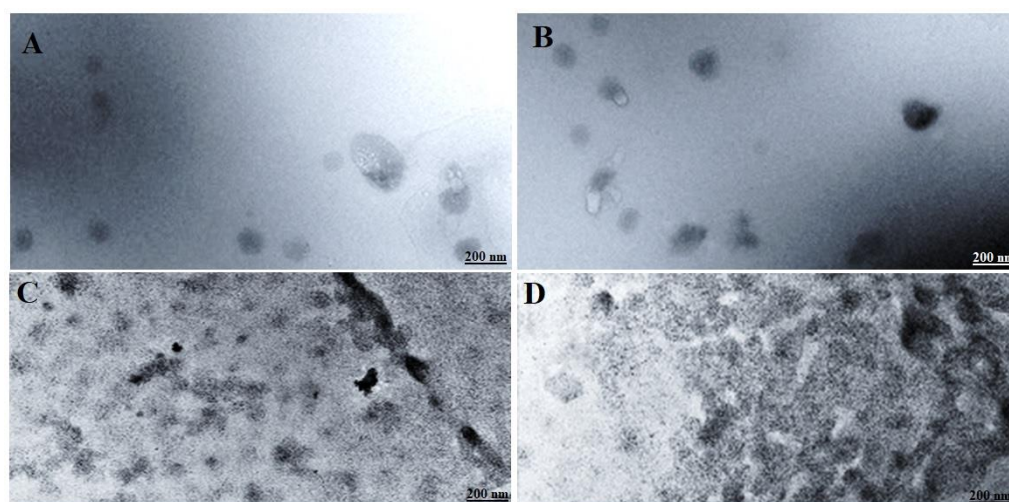

**Figure S1.** Representative images of cryo-TEM micrographs: (A) CVE6 nanoemulsion, (B) AVE6 nanoemulsion, (C) CVE6 gel, and (D) AVE6 gel. Magnification 49000X.
